# Supplementary material
Source: publisher site journal article supplement (https://www.degruyterbrill.com/publication/isbn/9781614516255/downloadAsset/9781614516255_CORRIGENDA.pdf)
Supplement: Supplementary file 1 [file 9781614516255_CORRIGENDA.pdf]

# CORRIGENDA

| Page & line                         | Text with error                                                                                                                                                                                                                                                   | Corrected text                                                                                                                                                                                                                                                                                                                        |
|-------------------------------------|-------------------------------------------------------------------------------------------------------------------------------------------------------------------------------------------------------------------------------------------------------------------|---------------------------------------------------------------------------------------------------------------------------------------------------------------------------------------------------------------------------------------------------------------------------------------------------------------------------------------|
| p. xi, 4.10                         | The pronoun ( <b>subj.</b> ) + pronoun ( <b>obj.</b> )                                                                                                                                                                                                            | The pronoun ( <b>obj.</b> ) + pronoun ( <b>subj.</b> )                                                                                                                                                                                                                                                                                |
| p. 38, ln 18                        | ... also <b>tend</b> to be ...                                                                                                                                                                                                                                    | ... also <b>tends</b> to be ...                                                                                                                                                                                                                                                                                                       |
| p. 39, ln 3                         | ... would <b>have not</b> caused ...                                                                                                                                                                                                                              | ... would <b>not have</b> caused ...                                                                                                                                                                                                                                                                                                  |
| p. 39, lns 17-18<br>(in the middle) | And on the <b>noun <i>absolute</i> and the adjective <i>voluntary</i></b> ...                                                                                                                                                                                     | And on the <b>adjectives <i>absolute</i> and <i>voluntary</i></b> ...                                                                                                                                                                                                                                                                 |
| p. 40, ln 10<br>(from bottom)       | As Schmied ( <b>2004</b> : 926) ...                                                                                                                                                                                                                               | As Schmied ( <b>2004a</b> : 926) ...                                                                                                                                                                                                                                                                                                  |
| p. 41, ln 2                         | ... Schmied (2004: 926-927) ...                                                                                                                                                                                                                                   | ... Schmied ( <b>2004a</b> : 926-927) ...                                                                                                                                                                                                                                                                                             |
| p. 41, ln 9                         | ... ending in < <i>er</i> > ...                                                                                                                                                                                                                                   | ... ending in < <i>r</i> > ...                                                                                                                                                                                                                                                                                                        |
| p. 43, ln 4<br>(bottom)             | ... in which the final <b>-al</b> or <b>-le</b> ...                                                                                                                                                                                                               | ... in which the final < <i>al</i> > or < <i>le</i> > ...                                                                                                                                                                                                                                                                             |
| p. 44, ln 4                         | both /ə/ <b>or</b> /l/                                                                                                                                                                                                                                            | both /ə/ <b>and</b> /l/                                                                                                                                                                                                                                                                                                               |
| p. 44, ln 18<br>(middle)            | accented syllable” (Cuttenden 2014: 164) ...                                                                                                                                                                                                                      | accented syllable” (Cruttenden 2014: 164) ...                                                                                                                                                                                                                                                                                         |
| p. 44, fn 15                        | ... by Schmied ( <b>2004</b> : 929).                                                                                                                                                                                                                              | ... by Schmied ( <b>2004a</b> : 929).                                                                                                                                                                                                                                                                                                 |
| p. 46, ln 13                        | ... <i>irate</i> /ai' ret/ ...                                                                                                                                                                                                                                    | ... <i>irate</i> /i' ret/ ...                                                                                                                                                                                                                                                                                                         |
| p. 47, ln 17<br>(middle)            | ... and < <i>ify</i> >.                                                                                                                                                                                                                                           | ... and <(i)fy>.                                                                                                                                                                                                                                                                                                                      |
| p. 48, ln 20<br>(middle)            | ... <i>speculative, and substantive</i> ;                                                                                                                                                                                                                         | ... <b>and speculative</b> ;                                                                                                                                                                                                                                                                                                          |
| p. 48, ln 11                        | timed/syllable- <b>time</b> ...                                                                                                                                                                                                                                   | timed/syllable- <b>timed</b> ...                                                                                                                                                                                                                                                                                                      |
| p. 94, ln 8<br>(bottom)             | In their (frequent) KenE structures to <i>abet sb</i> and <i>to facilitate sb</i> , <b><i>abet</i> and <i>facilitate</i> are given an animate object where they would be given an inanimate one (to <i>abet sth</i> and to <i>facilitate sth</i>) in StdIntE.</b> | In their (frequent) KenE structures to <i>abet sth</i> and <i>to facilitate sb</i> , <b><i>abet</i> is given an inanimate object and <i>facilitate</i> an animate one</b> where <i>abet</i> would be given an animate object ( <i>to abet sb</i> ) and <i>to facilitate</i> an inanimate one ( <i>to facilitate sth</i> ) in StdIntE. |
| p. 95, ln 9<br>(bottom)             | ... <b>on</b> Kiswahili ...                                                                                                                                                                                                                                       | ... <b>in</b> Kiswahili ...                                                                                                                                                                                                                                                                                                           |
| p. 97, ln 6<br>(bottom)             | ... after <i>enable</i> + <b>direct</b> object                                                                                                                                                                                                                    | ... after <i>enable</i> + <b>V</b> + <b>direct</b> object                                                                                                                                                                                                                                                                             |
| p. 108, ln 7                        | ... where it <b>has moved it</b>                                                                                                                                                                                                                                  | ... where it <b>has been moved to</b>                                                                                                                                                                                                                                                                                                 |
| p. 117, ln 3                        | The pronoun ( <b>subj.</b> ) + pronoun ( <b>obj.</b> )                                                                                                                                                                                                            | The pronoun ( <b>obj.</b> ) + pronoun ( <b>subj.</b> )                                                                                                                                                                                                                                                                                |
| p. 117, ln 12                       | ... the pronoun ( <b>subj.</b> ) + pronoun ( <b>obj.</b> )                                                                                                                                                                                                        | ... the pronoun ( <b>obj.</b> ) + pronoun ( <b>subj.</b> )                                                                                                                                                                                                                                                                            |
| p. 135, 4.10                        | Pronoun ( <b>subj.</b> ) + pronoun ( <b>obj.</b> )                                                                                                                                                                                                                | Pronoun ( <b>obj.</b> ) + pronoun ( <b>subj.</b> )                                                                                                                                                                                                                                                                                    |
| p. 150, (9)                         | <b><i>a</i> bride wealth</b>                                                                                                                                                                                                                                      | <i>bride wealth</i>                                                                                                                                                                                                                                                                                                                   |
| p. 174, lns 4-5<br>(bottom)         | ... examples are <b><i>aerial</i> (vs. AmE <i>antenna</i>), <i>butchery</i></b> ...                                                                                                                                                                               | ... examples are <i>butchery</i> ...                                                                                                                                                                                                                                                                                                  |
| p. 182, 6.1.2                       | ... reference <b>or no</b> referent at all                                                                                                                                                                                                                        | ... reference <b>or with no</b> referent at all                                                                                                                                                                                                                                                                                       |
| p. 245, ln 13                       | Nairobi thesis.                                                                                                                                                                                                                                                   | Nairobi <b>MA</b> thesis.                                                                                                                                                                                                                                                                                                             |
